# Supplementary material for: Association between Prior Cytotoxic Therapy, Antecedent Hematologic Disorder, and Outcome after Allogeneic Hematopoietic Cell Transplantation in Adult Acute Myeloid Leukemia
Source: MDPI journal article supplement (doi:10.3390/cancers15020352), 2023-01-05

# Supplementary Materials: Association Between Prior Cytotoxic Therapy, Antecedent Hematologic Disorder, and Outcome after Allogeneic Hematopoietic Cell Transplantation in Adult Acute Myeloid Leukemia

Corentin Orvain, Eduardo Rodríguez-Arbol, Megan Othus, Brenda M. Sandmaier, H. Joachim Deeg, Frederick R. Appelbaum and Roland B. Walter

**SUPPLEMENTARY TABLE S1.** Primary disease and treatment-related characteristics in patients with therapy-related acute myeloid leukemia (n=115) and after antecedent hematologic disorder (n=125);

## *Post cytotoxic therapy (n=115)*

|                                                                              |                 |
|------------------------------------------------------------------------------|-----------------|
| <b>Previous condition (malignancy, auto-immune disease), n (%)</b>           |                 |
| Lymphoid hematologic malignancy                                              | 39 (34%)        |
| Breast cancer                                                                | 35 (30%)        |
| Auto-immune disease                                                          | 13 (11%)        |
| Testicular cancer                                                            | 5 (4%)          |
| Thyroid cancer                                                               | 5 (4%)          |
| Sarcoma                                                                      | 4 (4%)          |
| Uterine cancer                                                               | 4 (4%)          |
| Acute leukemia                                                               | 3 (3%)          |
| Prostate cancer                                                              | 3 (3%)          |
| Brain tumor                                                                  | 2 (2%)          |
| Other solid tumors                                                           | 2 (2%)          |
| <b>Type of prior therapy</b>                                                 |                 |
| Chemotherapy, n (%)                                                          | 98 (85%)        |
| Radiation, n (%)                                                             | 61 (53%)        |
| Autologous HCT, n (%)                                                        | 11 (10%)        |
| Time interval from last treatment for previous condition to AML (IQR), years | 3.3 (1.8 - 7.6) |

## *Antecedent hematologic disorder (AHD) (n=125)*

|                                                                                          |                    |
|------------------------------------------------------------------------------------------|--------------------|
| <b>Type, n (%)</b>                                                                       |                    |
| MDS                                                                                      | 97 (78%)           |
| MPN                                                                                      | 18 (14%)           |
| CMML                                                                                     | 10 (8%)            |
| <b>Previously treated for another condition (malignancy, auto-immune disease), n (%)</b> | 20 (16%)           |
| <b>Previously treated for AHD, n (%)</b>                                                 | 50 (40%)           |
| <b>Time interval from AHD to AML (IQR), years</b>                                        | 0.66 (0.18 - 1.83) |

Abbreviations: AHD, antecedent hematologic disorder; AML, acute myeloid leukemia; CMML, chronic myelomonocytic leukemia; HCT, hematopoietic cell transplantation; MDS, myelodysplastic syndrome, MPN, myeloproliferative neoplasm.

**SUPPLEMENTARY TABLE S2.** Pre-HCT demographic and clinical characteristics of study cohort (n=979), stratified according to disease status at diagnosis (de novo vs. post cytotoxic therapy vs. after antecedent hematologic disorder [AHD]), after considering as *de novo* AML, five patients with auto-immune disorders treated with methotrexate, mercaptopurine, and cyclophosphamide and 34 patients with AHD diagnosed less than three months before AML.

| Characteristic                                             | All patients (n=979) | De novo (n=798) | Post cytotoxic therapy (n=110) | AHD (n=71)    |
|------------------------------------------------------------|----------------------|-----------------|--------------------------------|---------------|
| <b>Age at HCT (IQR), years</b>                             | 55 (42 - 64)         | 54 (41 - 62)    | 57 (48 - 66)                   | 65 (58 - 69)  |
| <b>Female gender, n (%)</b>                                | 454 (46%)            | 367 (46%)       | 67 (61%)                       | 20 (28%)      |
| <b>WBC count at diagnosis (IQR), G/l</b>                   | 8 (2 - 40)           | 9 (2 - 46)      | 5 (2 - 33)                     | 3 (1 - 14)    |
| <b>Cytogenetic risk (MRC), n (%)</b>                       |                      |                 |                                |               |
| Favorable                                                  | 72 (8%)              | 61 (8%)         | 11 (10%)                       | 0             |
| Intermediate                                               | 659 (70%)            | 545 (71%)       | 65 (61%)                       | 49 (73%)      |
| Adverse                                                    | 213 (23%)            | 164 (21%)       | 31 (29%)                       | 18 (27%)      |
| <b>ELN-2017 risk classification, n (%)</b>                 |                      |                 |                                |               |
| Favorable                                                  | 175 (18%)            | 148 (19%)       | 21 (20%)                       | 6 (9%)        |
| Intermediate                                               | 508 (54%)            | 422 (55%)       | 45 (42%)                       | 41 (60%)      |
| Adverse                                                    | 264 (28%)            | 202 (26%)       | 41 (38%)                       | 21 (31%)      |
| <b>ELN-2022 risk classification, n (%)</b>                 |                      |                 |                                |               |
| Favorable                                                  | 153 (16%)            | 130 (17%)       | 18 (17%)                       | 5 (7%)        |
| Intermediate                                               | 507 (54%)            | 425 (55%)       | 44 (41%)                       | 38 (56%)      |
| Adverse                                                    | 286 (30%)            | 216 (28%)       | 45 (42%)                       | 25 (37%)      |
| <b>Time from last remission to HCT (IQR), days</b>         | 98 (69 - 146)        | 102 (71 - 148)  | 95 (69 - 130)                  | 78 (57 - 112) |
| <b>Disease status at HCT, n (%)</b>                        |                      |                 |                                |               |
| First remission                                            | 747 (76%)            | 585 (73%)       | 101 (92%)                      | 61 (86%)      |
| Second remission                                           | 232 (24%)            | 213 (27%)       | 9 (8%)                         | 10 (14%)      |
| <b>MFC status before HCT, n (%)</b>                        |                      |                 |                                |               |
| MRD-negative                                               | 788 (80%)            | 660 (83%)       | 84 (76%)                       | 44 (62%)      |
| MRD-positive                                               | 191 (20%)            | 138 (17%)       | 26 (24%)                       | 27 (38%)      |
| <b>HCT-CI category at HCT, n (%)</b>                       |                      |                 |                                |               |
| Low                                                        | 339 (35%)            | 309 (39%)       | 8 (7%)                         | 22 (31%)      |
| Intermediate                                               | 347 (35%)            | 292 (37%)       | 27 (25%)                       | 28 (39%)      |
| High                                                       | 293 (30%)            | 197 (25%)       | 75 (68%)                       | 21 (30%)      |
| <b>Recovered peripheral blood counts before HCT, n (%)</b> | 680 (69%)            | 568 (71%)       | 72 (65%)                       | 40 (56%)      |
| <b>Stem cell source, n (%)</b>                             |                      |                 |                                |               |
| BM                                                         | 81 (8%)              | 72 (9%)         | 7 (6%)                         | 2 (3%)        |
| PBSC                                                       | 766 (78%)            | 616 (77%)       | 88 (80%)                       | 62 (87%)      |
| Cord blood                                                 | 132 (13%)            | 110 (14%)       | 15 (14%)                       | 7 (10%)       |
| <b>HLA matching, n (%)</b>                                 |                      |                 |                                |               |
| Identical related donor                                    | 227 (23%)            | 180 (23%)       | 34 (31%)                       | 13 (18%)      |
| Matched unrelated donor                                    | 482 (49%)            | 387 (48%)       | 54 (49%)                       | 41 (58%)      |
| 1-2 allele mismatch                                        | 101 (10%)            | 88 (11%)        | 4 (4%)                         | 9 (13%)       |
| Haplo-identical                                            | 37 (4%)              | 33 (4%)         | 3 (3%)                         | 1 (1%)        |
| Cord blood                                                 | 132 (13%)            | 110 (14%)       | 15 (14%)                       | 7 (10%)       |
| <b>Conditioning regimen intensity, n (%)</b>               |                      |                 |                                |               |
| MAC                                                        | 583 (60%)            | 507 (64%)       | 48 (44%)                       | 28 (39%)      |
| Non-MAC                                                    | 396 (40%)            | 291 (36%)       | 62 (56%)                       | 43 (61%)      |

Abbreviations: BM, bone marrow; HCT, hematopoietic cell transplantation; HCT-CI, HCT comorbidity index; HLA, human leukocyte antigen; MAC, myeloablative conditioning; MFC, multiparameter flow cytometry; MRC, U.K. Medical Research Council; MRD, measurable residual disease; PBSC, peripheral blood stem cells; WBC, white blood cell count.

**SUPPLEMENTARY FIGURE S1.** Post-HCT outcomes for 990 adults with AML undergoing allogeneic HCT while in first or second morphologic remission, stratified by disease status at diagnosis (*de novo* vs. therapy-related vs. antecedent hematologic disorder) after considering as *de novo* AML, five patients with auto-immune disorders treated with methotrexate, mercaptopurine, and cyclophosphamide and 34 patients with AHD diagnosed less than three months before AML. (A) Non-relapse mortality, (B) relapse, (C) relapse-free survival, and (D) overall survival

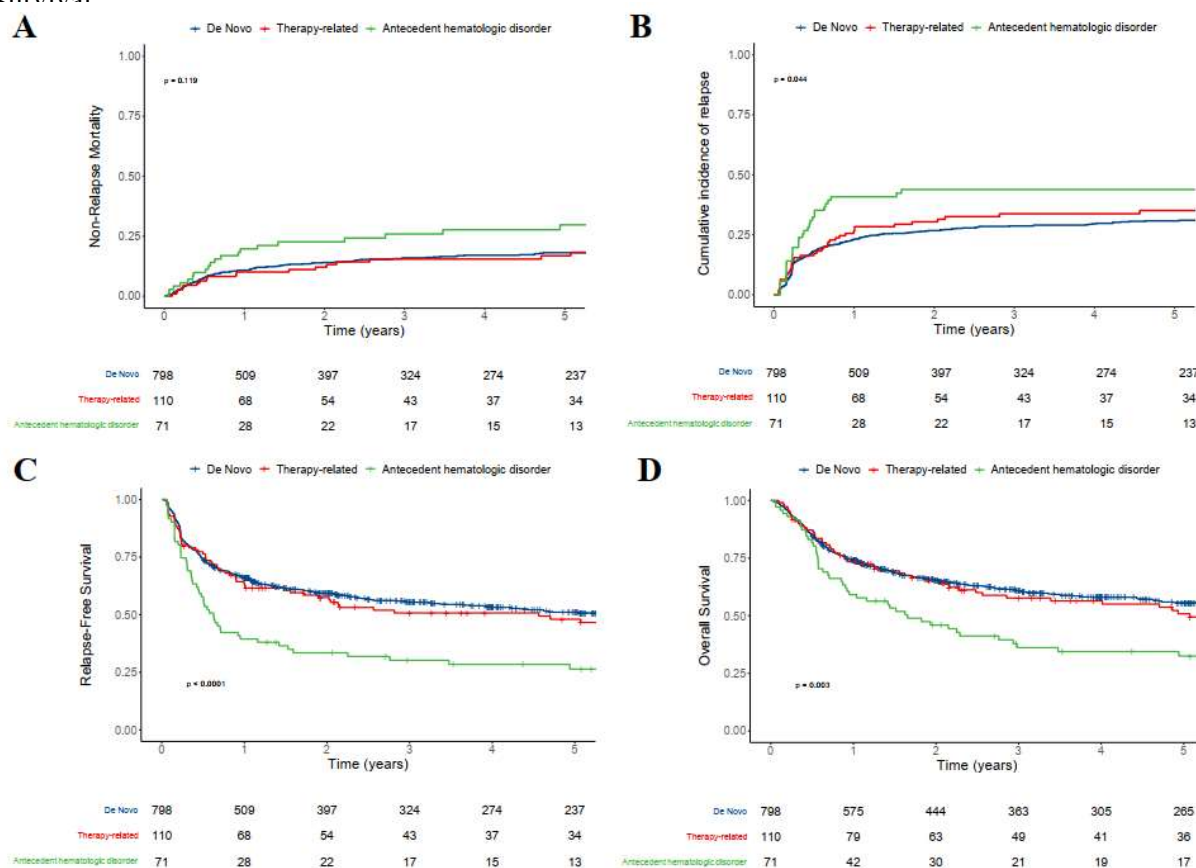

**SUPPLEMENTARY FIGURE S2.** Post-HCT outcomes for 125 adults with AHD AML undergoing allogeneic HCT while in first or second morphologic remission, stratified by type of disease (myelodysplastic syndrome [MDS] vs. chronic myelomonocytic leukemia [CMML] vs. myeloproliferative neoplasm [MPN]). (A) Non-relapse mortality, (B) relapse, (C) relapse-free survival, and (D) overall survival.

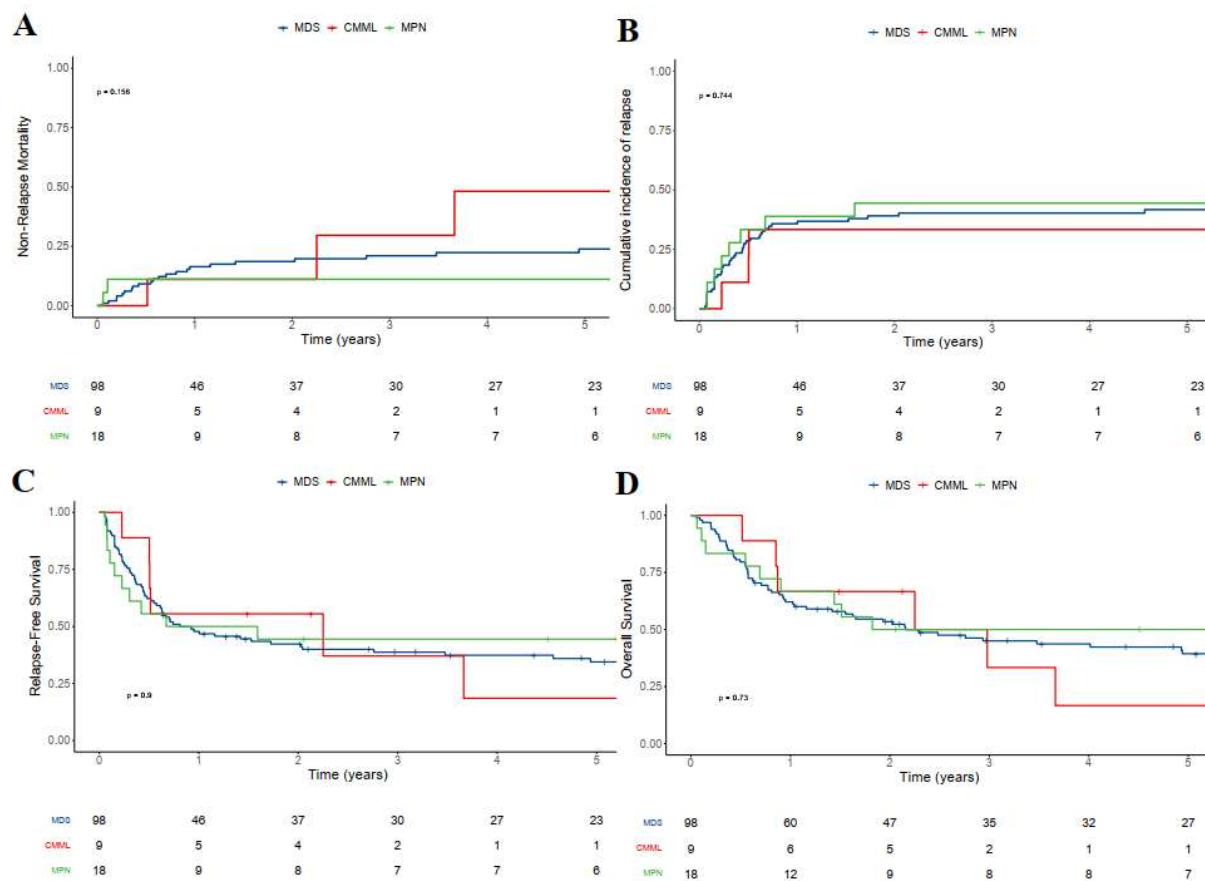

**SUPPLEMENTARY FIGURE S3.** Post-HCT outcomes for 125 adults with AHD AML undergoing allogeneic HCT while in first or second morphologic remission, stratified by prior treatment for AHD (yes vs. no). (A) Non-relapse mortality, (B) relapse, (C) relapse-free survival, and (D) overall survival

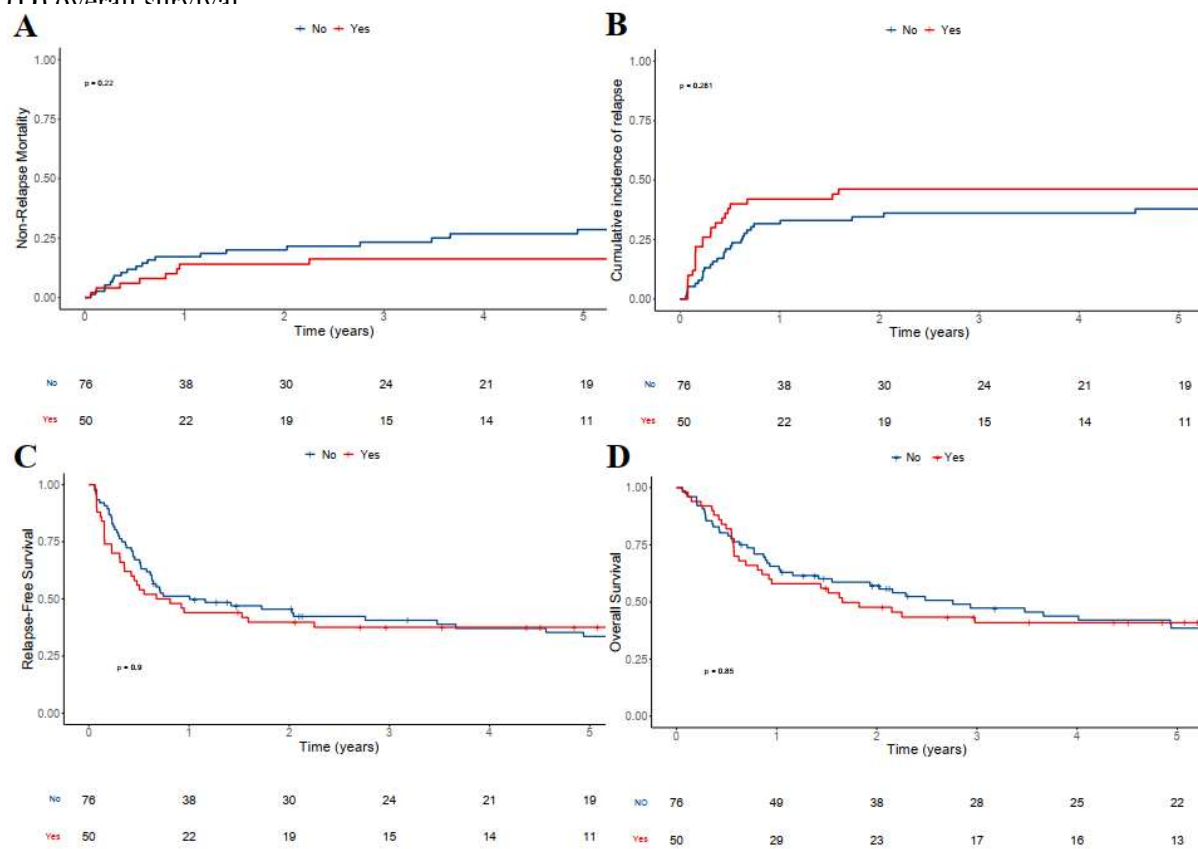

**SUPPLEMENTARY FIGURE S4.** Post-HCT outcomes for 143 adults with AML undergoing allogeneic HCT following reduced-intensity conditioning while in first or second morphologic remission, stratified by disease status at diagnosis (*de novo* vs. therapy-related vs. antecedent hematologic disorder). (A) Non-relapse mortality, (B) relapse, (C) relapse-free survival, and (D) overall survival.

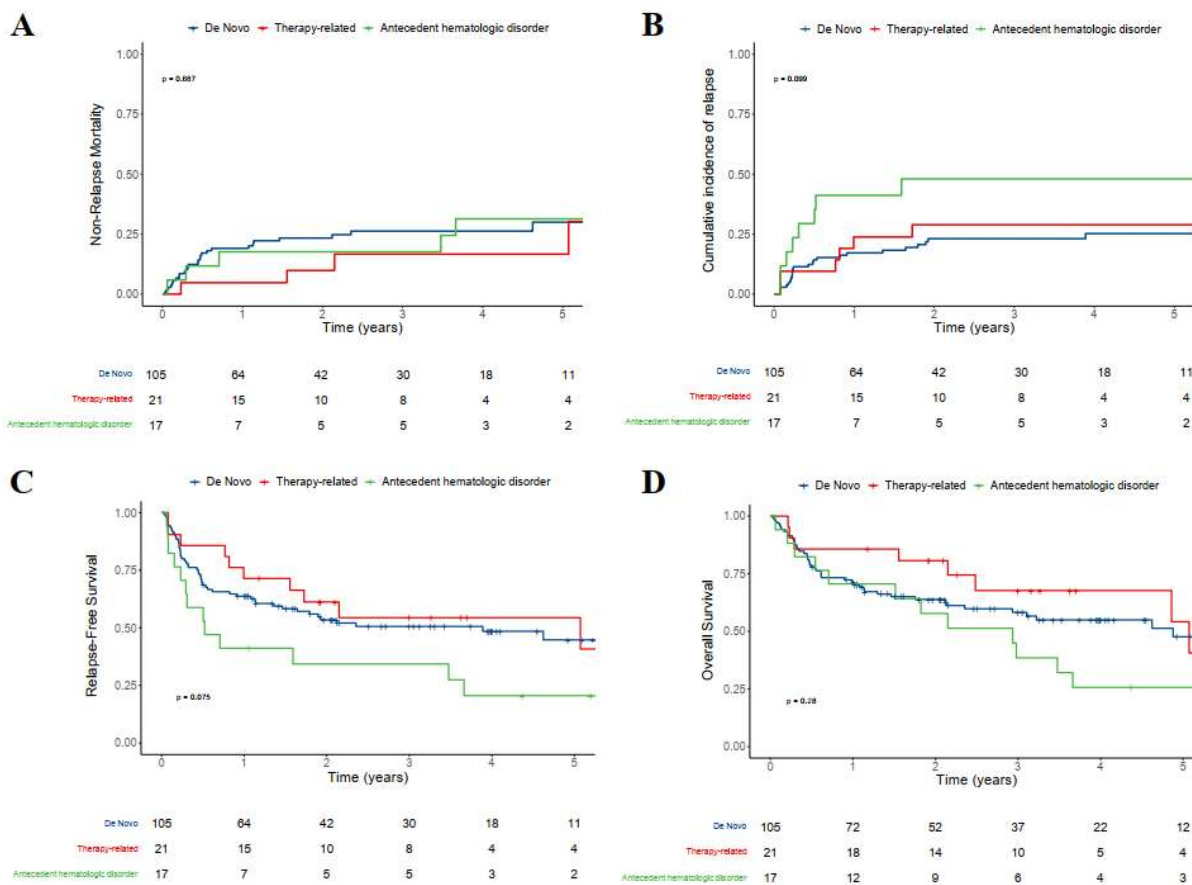

**SUPPLEMENTARY FIGURE S5.** Post-HCT outcomes for 253 adults with AML undergoing allogeneic HCT following non-myeloablative conditioning while in first or second morphologic remission, stratified by disease status at diagnosis (*de novo* vs. therapy-related vs. antecedent hematologic disorder). (A) Non-relapse mortality, (B) relapse, (C) relapse-free survival, and (D) overall survival.

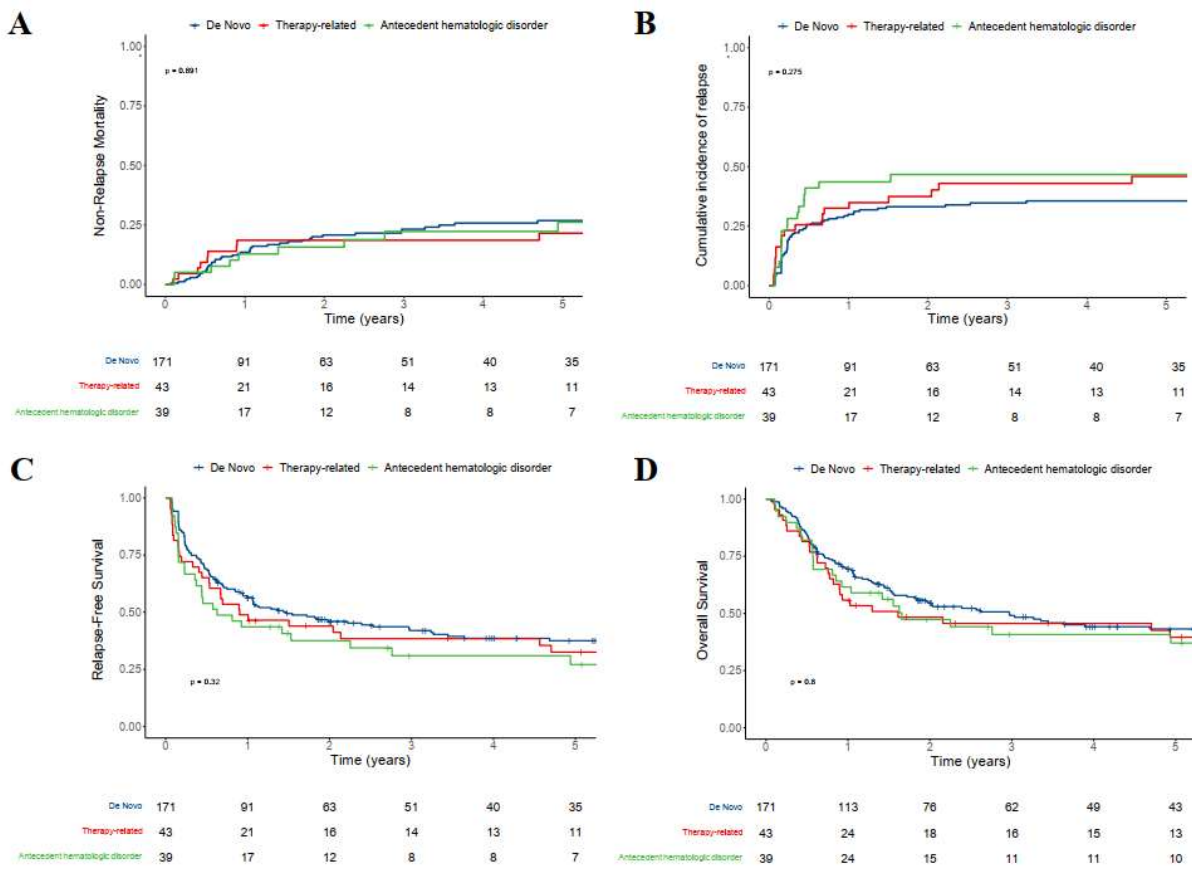

Supplement: s1 [file s1]
